# Supplementary material
Source: Elsevier journal article supplement (http://natap.org/2024/HCV/mmc1.pdf)
Supplement: mmc1 [file mmc1.pdf]

# THE LANCET

## Gastroenterology & Hepatology

### Supplementary appendix

This appendix formed part of the original submission and has been peer reviewed. We post it as supplied by the authors.

Supplement to: Marshall AD, Willing AR, Kairouz A, et al. Direct-acting antiviral therapies for hepatitis C infection: global registration, reimbursement, and restrictions. *Lancet Gastroenterol Hepatol* 2024; published online Feb 14. [https://doi.org/10.1016/S2468-1253\(23\)00335-7](https://doi.org/10.1016/S2468-1253(23)00335-7).

## **Appendix**

### **Contents**

|                                                                                                                            |           |
|----------------------------------------------------------------------------------------------------------------------------|-----------|
| <i>Supplementary Table 1: Global HCV and HIV Treatment Restrictions Group (Network): Name and Affiliation .....</i>        | <i>2</i>  |
| <i>Supplementary Table 2. Criteria for countries that have drug and alcohol use restrictions for HCV DAA therapy .....</i> | <i>10</i> |
| <i>Supplementary Table 3. Criteria for countries that have retreatment restrictions for HCV DAA therapy .....</i>          | <i>11</i> |
| <i>Supplementary Figure 1. Restrictions to reimbursed DAAs for HCV infection by country .....</i>                          | <i>17</i> |

**Supplementary Table 1: Global HCV and HIV Treatment Restrictions Group (Network): Name and Affiliation**

| <b>Name</b>           | <b>Affiliation</b>                                                                                                                                                                                                                 |
|-----------------------|------------------------------------------------------------------------------------------------------------------------------------------------------------------------------------------------------------------------------------|
| Narina Sargsyants     | Ministry of Health; National Centre for Infectious Diseases; National Institute of Health; Armenian Association of Infectious Diseases; ESCMID Study Group for Viral Hepatitis, Armenia                                            |
| Leyla Suleymanova     | Struggle against AIDS, Azerbaijan                                                                                                                                                                                                  |
| Nermin Salkic         | University Clinical Center Tuzla; Internal Medicine Hospital, Bosnia and Herzegovina                                                                                                                                               |
| Marieta Simonova      | Department of Gastroenterology, Hepato-Pancreato-Biliary Surgery and Transplantology, Military Medical Academy, Sofia, Bulgaria                                                                                                    |
| Tatjana Nemeth-Blazic | Department for HIV, Sexual and Blood Transmitted Diseases, Division for Epidemiology of Communicable Diseases, Reference Center of the epidemiology of the Ministry of Health; Croatian Institute of Public Health (CIPH), Croatia |
| Viktor Mravcik        | Department of Addictology, First Faculty of Medicine, Charles University and General University Hospital in Prague, Czech Republic<br>Spolecnost Podane ruce, Brno, Czech Republic                                                 |
| Kristel Kivimets      | National Institute for Health Development, Hiiu, Estonia                                                                                                                                                                           |
| Riina Salupere        | Tartu University Hospital, University of Tartu, Estonia                                                                                                                                                                            |
| Maia Butsashvili      | Health Research Union (HRU), Georgia                                                                                                                                                                                               |
| George Soselia        | Médecins du Monde (MdM)/Doctors of the World, Georgia                                                                                                                                                                              |
| Mihály Makara         | Central Hospital of Southern Pest National Institute of Hematology and Infectious Diseases, Saint Laszlo Hospital, Outpatient Clinic, Budapest, Hungary                                                                            |
| Ieva Tolmane          | Department of Hepatology, Infectology Center of Latvia, Riga East University Hospital, Riga, Latvia<br>University of Latvia, Riga, Latvia                                                                                          |
| Ligita Jancorienė     | Centre of Infectious Diseases, Vilnius University Hospital Santaros Klinikos; Institute of Clinical Medicine, Medical Faculty, Vilnius University, Vilnius, Lithuania                                                              |
| Silvia Stratulat      | Department of Epidemiological Surveillance of HIV Infection and Viral Hepatitis, National Agency for Public Health, Moldova                                                                                                        |
| Robert Flisiak        | Department of Infectious Diseases and Hepatology, Medical University of Bialystok, Bialystok, Poland                                                                                                                               |
| Liana Gheorghe        | Gastroenterology and Hepatology, Fundeni Clinical Institute, Bucharest, Romania                                                                                                                                                    |
| Roxana Cernat         | Ovidius University of Constanta, Romania                                                                                                                                                                                           |
| Aleksey Lakhov        | Humanitarian Action, St. Petersburg, Russia                                                                                                                                                                                        |
| Oxana Stanevich       | Humanitarian Action, St. Petersburg, Russia                                                                                                                                                                                        |

|                           |                                                                                                                                                             |
|---------------------------|-------------------------------------------------------------------------------------------------------------------------------------------------------------|
| Peter Jarcuska            | 2nd Department of Internal Medicine, PJ Safarik University, Faculty of Medicine and L Pasteur University Hospital, Kosice, Slovakia                         |
| Markus Peck-Radosavljevic | Internal Medicine & Gastroenterology (IMuG) with Central Admission & First Aid (ZAE) Klinikum Klagenfurt am Wörthersee Feschnigstrasse, Klagenfurt, Austria |
| Geert Robaeys             | Department of Gastroenterology and Hepatology, Ziekenhuis Oost Limburg, Genk, Belgium                                                                       |
| Anne Øvrehus              | Department of Infectious Diseases, Odense University Hospital, University of Southern Denmark, Odense, Denmark                                              |
| Graham Foster             | Queen Mary University of London, London, UK                                                                                                                 |
| Jussi Sutinen             | Department of Infectious Diseases, Inflammation Center, Helsinki University Hospital; University of Helsinki, Helsinki, Finland                             |
| Martti Farkkila           | Department of Infectious Diseases, Inflammation Center, Helsinki University Hospital; University of Helsinki, Helsinki, Finland                             |
| Henna Rautiainen          | Gastroenterology, University of Helsinki and Helsinki University Hospital, Finland                                                                          |
| Sauli Vuoti               | Department of Clinical and Pharmaceutical Chemistry, University of Jyväskylä, Jyväskylä, Finland                                                            |
| Dafina Nikolova           | University Clinic of Gastroenterohepatology, Faculty of Medicine, University "Ss. Cyril and Methodius", Skopje, North Macedonia                             |
| Jean-Michel Pawlotsky     | Hopital Henri Mondor, Universite Paris Est, Créteil, France                                                                                                 |
| Juergen Rockstroh         | University Hospital Bonn AöR Medical Clinic and Polyclinic; Campus Venusberg, Bonn, Germany                                                                 |
| Vana Sypsa                | Department of Hygiene, Epidemiology and Medical Statistics, Medical School, National and Kapodistrian University of Athens, Greece                          |
| George Papatheodoridis    | Medical School, National and Kapodistrian University of Athens, Greece                                                                                      |
| Sigurður Ólafsson         | Division of Gastroenterology, Department of Medicine, Landspítali University Hospital, Reykjavik, Iceland                                                   |
| Eoin Feeney               | Centre for Experimental Pathogen: Host Research, School of Medicine, University College Dublin; St Vincent's University Hospital, Dublin, Ireland           |
| Elisabetta Teti           | Infectious Disease Unit, Department of System Medicine, Tor Vergata University and Hospital, Rome, Italy                                                    |
| Carole Seguin-Devaux      | Department of Infection and Immunity, Luxembourg Institute of Health, Esch sur Alzette, Luxembourg                                                          |
| James Pocock              | Gastroenterology Department, Mater Dei Hospital, Msida, Malta                                                                                               |
| Sascha Reiff              | Department for Policy in Health, Malta                                                                                                                      |
| Neil McDougall            | Regional Liver Unit, Royal Victoria Hospital, Belfast, UK                                                                                                   |
| Marc Van der Valk         | Department of Infectious Diseases, Academic Medical Center, Amsterdam, Netherlands                                                                          |

|                           |                                                                                                                                                                                                                |
|---------------------------|----------------------------------------------------------------------------------------------------------------------------------------------------------------------------------------------------------------|
| Olav Dalgard              | Department of Infectious Diseases, Akershus University Hospital, University of Oslo, Oslo, Norway                                                                                                              |
| Rui Tato Marinho          | Centro Hospitalar Universitário Lisboa Norte, Medical School of Lisbon, University of Lisbon; Director National Program for Viral Hepatitis, Directorate General of Health                                     |
| John Dillon               | Hepatology & Gastroenterology, School of Medicine, University of Dundee; Ninewells Hospital and Medical School, Dundee, UK                                                                                     |
| Erica Peters              | Infectious Diseases and General Medicine, Queen Elizabeth University Hospital, Glasgow, UK                                                                                                                     |
| Ksenija Bojovic           | Faculty of Medicine, University of East Sarajevo, Foca, Republika of Srpska                                                                                                                                    |
| Mojca Matičič             | Clinic for Infectious Diseases and Febrile Illnesses, University Medical Centre, Ljubljana, Slovenia                                                                                                           |
| Martin Kåberg             | Department of Global Public Health, Karolinska Institutet, Stockholm, Sweden                                                                                                                                   |
| Philip Bruggmann          | Arud Centres for Addiction Medicine, Zürich, Switzerland                                                                                                                                                       |
| Brendan Healy             | Public Health Wales Microbiology Cardiff and Swansea, University Hospital of Wales, UK                                                                                                                         |
| Vui Heng Chong            | Division of Gastroenterology and Hepatology Department of Medicine, Ripas Hospital, Brunei Darussalam; Institute of Health Sciences PAPRSB, University Brunei Darussalam, Brunei Darussalam                    |
| Siyani Yi                 | Saw Swee Hock School of Public Health, National University of Singapore, Singapore; KHANA Center for Population Health Research, Cambodia; Center for Global Health Research, Touro University California, USA |
| Joseph Tucker             | UNC School of Medicine; London School of Hygiene and Tropical Medicine, China                                                                                                                                  |
| Luxi R. Pasaribu          | Indonesia Agency for Health Research and Development, Indonesia                                                                                                                                                |
| Junko Tanaka              | Department of Epidemiology, Infectious Disease Control & Prevention, Hiroshima University, Japan                                                                                                               |
| Elizabeth A. Ashley       | Lao-Oxford-Mahosot Hospital-Wellcome Trust Research Unit, Vientiane, Laos; Centre for Tropical Medicine and Global Health, Nuffield Department of Medicine, University of Oxford, Oxford, UK                   |
| Muhammad Radzi Abu Hassan | Clinical Research Center, Sultanah Bahiyah Hospital, Malaysia                                                                                                                                                  |
| Noor Syahireen Mohammed   | Clinical Research Center, Sultanah Bahiyah Hospital, Malaysia                                                                                                                                                  |
| Huan-Keat Chan            | Clinical Research Center, Sultanah Bahiyah Hospital, Malaysia                                                                                                                                                  |
| Sarantuya Gidaagaya       | Department of Gastroenterology and Endoscopy, Intermed Hospital, Ulaanbaatar, Mongolia                                                                                                                         |
| Khin Pyone Kyi            | Myanmar Liver Foundation; Department of Medical Research, Ministry of Health, Myanmar                                                                                                                          |

|                          |                                                                                                                                                                                                                                                                                                                                       |
|--------------------------|---------------------------------------------------------------------------------------------------------------------------------------------------------------------------------------------------------------------------------------------------------------------------------------------------------------------------------------|
| Kim Hyung Joon           | Department of Internal Medicine, Chung-Ang University College of Medicine, Seoul, Republic of Korea                                                                                                                                                                                                                                   |
| BumSik Chin              | Division of Infectious Diseases, Department of Internal Medicine, National Medical Center, Seoul, Republic of Korea                                                                                                                                                                                                                   |
| Pauline Camille Baladjay | Disease Prevention and Control Bureau, Department of Health, the Philippines                                                                                                                                                                                                                                                          |
| Jia-Horng Kao            | Graduate Institute of Clinical Medicine, National Taiwan University College of Medicine; National Taiwan University Hospital, Taiwan                                                                                                                                                                                                  |
| Tanyaporn Wansom         | Armed Forces Research Institute of Medical Sciences, Bangkok, Thailand                                                                                                                                                                                                                                                                |
| Bernardino da Cruz       | National HIV Program, Department of Communicable Diseases, Servicos Centrais do Ministerio de Saude, Timor-Leste                                                                                                                                                                                                                      |
| Barnaby Flower           | Department of Infectious Disease, Imperial College London, UK; St Mary's Hospital, Praed Street, London W2 1NY                                                                                                                                                                                                                        |
| Ehsanullah Ehsan         | Ministry of Public Health, Kabul, Afghanistan                                                                                                                                                                                                                                                                                         |
| Mamun Al Mahtab          | Interventional Hepatology Division, Bangabandhu Sheikh Mujib Medical University, Dhaka, Bangladesh<br>Strategic and Technical Advisory Group on Viral Hepatitis, HIV and STIs (STAG-HHS), WHO-SEAR<br>Visiting Faculty, Department of Gastroenterology and Metabology, Ehime University Graduate School of Medicine, Matsuyama, Japan |
| Lekey Khandu             | National HIV, Hepatitis and STIs Control Program, Department of Public Health, Ministry of Health, Thimphu, Bhutan                                                                                                                                                                                                                    |
| Ajeet Singh Bhadoria     | Associate Professor, Community and Family Medicine; All India Institute of Medical Sciences (AIIMS), Rishikesh, Uttarakhand, India                                                                                                                                                                                                    |
| Maryam Alavi             | The Kirby Institute, University of New South Wales, Sydney, Australia                                                                                                                                                                                                                                                                 |
| Prawchan KC              | Society of Positive Atmosphere and Related Support for HIV and AIDS, (SPARSHA-Nepal), Kathmandu, Nepal                                                                                                                                                                                                                                |
| Saeed Hamid              | Department of Medicine, The Aga Khan University, Karachi, Pakistan                                                                                                                                                                                                                                                                    |
| Sergey Biryukov          | AGEPC, Kazakhstan                                                                                                                                                                                                                                                                                                                     |
| Damira Alymbaeva         | Department of Infectious Diseases, Kyrgyz-Russian Slavonic University, Bishkek, Kyrgyzstan                                                                                                                                                                                                                                            |
| Arash Alaei              | Departments of Health Science and Health Care Administration, California State University - Long Beach<br>Institute for International Health and Education<br>International Consultant for the Ministry of Health and Social Protection of Population, Republic of Tajikistan                                                         |
| Shokhista Bakieva        | Research Institute of Virology, Tashkent, Uzbekistan                                                                                                                                                                                                                                                                                  |
| Diego Flichman           | Institute of Biomedical Investigations in Retrovirus and AIDS (INBIRS), University of Buenos Aires, Argentina                                                                                                                                                                                                                         |
| Rodrigo F. Carmo         | Collegiate of Pharmaceutical Sciences Federal University of the São Francisco Valley, Brazil                                                                                                                                                                                                                                          |

|                             |                                                                                                                                                                                                                              |
|-----------------------------|------------------------------------------------------------------------------------------------------------------------------------------------------------------------------------------------------------------------------|
| Edgar Valdez                | Instituto para el Desarrollo Humano, Bolivia                                                                                                                                                                                 |
| Claudia P. Cortes           | Hospital Clínico San Borja Arriarán & Fundación Arriarán, Santiago, Chile; Departamento de Medicina, Facultad de Medicina, Universidad de Chile, Santiago, Chile                                                             |
| Fernando Contreras          | Universidad Pedro Henríquez Ureña, Santo Domingo, Dominican Republic                                                                                                                                                         |
| Enrique Teran               | Colegio de Ciencias de la Salud, Universidad San Francisco de Quito. Quito, Ecuador                                                                                                                                          |
| Patricia Velez-Moller       | Asociación Guatemalteca del Hígado, Guatemala City, Guatemala; World Hepatitis Alliance, London, UK                                                                                                                          |
| Tariq Jagarine              | National AIDS Programme Secretariat (NAPS), Ministry of Health (MOH), Guyana; Georgetown Public Hospital Corporation (GPHC), Guyana                                                                                          |
| Mike Mills                  | Department of Medicine UWI, Jamaica                                                                                                                                                                                          |
| David Goodman-Meza          | University of California, Los Angeles, Mexico                                                                                                                                                                                |
| Jorge Sánchez               | Centro de Investigaciones Tecnológicas Biológicas y Medioambientales, Universidad Nacional Mayor de San Marcos, Lima, Peru                                                                                                   |
| Juan José Montenegro-Idrogo | Centro de Investigaciones Tecnológicas, Biomédicas y Medioambientales, Universidad Nacional Mayor de San Marcos, Lima, Peru;<br>Servicio de Enfermedades Infecciosas y Tropicales, Hospital Nacional Dos de Mayo, Lima, Peru |
| Alexie M. Lugo Canales      | STD/HIV Prevention Division Health Department, Puerto Rico                                                                                                                                                                   |
| Jose Davy                   | Ministry of Health, Saint Vincent & Granadines                                                                                                                                                                               |
| Ayanna Alexander            | TRI Caribbean Network, Trinidad & Tobago                                                                                                                                                                                     |
| Solange Gerona              | Programa de Trasplante Hepático, Hospital Central de las Fuerzas Armadas, Montevideo, Uruguay                                                                                                                                |
| Rosalía Perazzo             | Hepatitis C Venezuela, Venezuela                                                                                                                                                                                             |
| Dashika Balak               | Sexual and Reproductive Health Clinic, Suva, Fiji                                                                                                                                                                            |
| Angela Kelly-Hanku          | University of New South Wales, Sydney, NSW, Australia; Papua New Guinea Institute of Medical Research, Goroka, Papua New Guinea                                                                                              |
| Angela Fineanganofa         | Ministry of Health, Public Health Building, Vaiola Hospital, Tofoa, Tonga                                                                                                                                                    |
| Ed Gane                     | New Zealand Liver Transplant Unit, Auckland Hospital, Auckland, New Zealand                                                                                                                                                  |
| Nigel Raymond               | Infection Service, Wellington Hospital, Wellington, New Zealand                                                                                                                                                              |
| Nabil Debzi                 | Hepatology Department, Mustapha Bacha Hospital, University of Algiers, Algeria                                                                                                                                               |
| Kannan Sridharan            | Department of Pharmacology and Therapeutics, Arabian Gulf University, Manama, Bahrain                                                                                                                                        |
| Imam Waked                  | National Liver Institute, Shebeen El-Kom, Egypt                                                                                                                                                                              |
| Dan Turner                  | CRUSAID Kobler AIDS Center, Infectious Diseases Unit, Tel-Aviv Sourasky Medical Center, Israel                                                                                                                               |
| Oren Shibolet               | Tel-Aviv Sourasky Medical Center, Sackler Faculty of Medicine, Tel-Aviv University, Tel-Aviv, Israel                                                                                                                         |

|                         |                                                                                                                                                                                                                                                                                             |
|-------------------------|---------------------------------------------------------------------------------------------------------------------------------------------------------------------------------------------------------------------------------------------------------------------------------------------|
| Anwar Al Muzaini        | Ministry of Health, Kuwait City, Kuwait                                                                                                                                                                                                                                                     |
| Mostafa El Nakib        | National AIDS Program, Lebanon                                                                                                                                                                                                                                                              |
| Dhastagir S. Sheriff    | Faculty of Medicine, Benghazi University, Benghazi Libya Arab Jamahiriya                                                                                                                                                                                                                    |
| Taha Brahni             | Association de Lutte Contre le Sida, Morocco                                                                                                                                                                                                                                                |
| Touria Essayagh         | Hassan First University of Settat, Institut Supérieur des Sciences de la Santé, Université Hassan Premier, Morocco                                                                                                                                                                          |
| Sanah Essayagh          | Hassan First University of Settat, Faculté des Sciences et Techniques, Laboratoire Agroalimentaire et Santé, Settat, Morocco                                                                                                                                                                |
| Diaa Hjaija             | Preventive Medicine Department, Palestinian Ministry of Health, Ramallah, Occupied Palestinian Territories                                                                                                                                                                                  |
| Khalid Al-Naamani       | The Armed Forces Hospital, Muscat, Oman                                                                                                                                                                                                                                                     |
| Faisal M. Sanai         | Division of Gastroenterology, Department of Medicine, King Abdulaziz Medical City, Jeddah, Saudi Arabia                                                                                                                                                                                     |
| Harriet Pasquale        | HIV/AIDs and STI Program, National Ministry of Health, South Sudan                                                                                                                                                                                                                          |
| Shahinaz Bedri          | Ahfad University for Women, Omdurman, Sudan; School of Medicine, Ahfad University for Women, Khartoum, Sudan                                                                                                                                                                                |
| Mohamed Chakroun        | Global Fund; Society for AIDS in Africa; Infectious Diseases Department, University Hospital, Monastir, Tunisia                                                                                                                                                                             |
| Amine Ghrabi            | Association Tunisienne d'Information et d'Orientation sur le SIDA et la Toxicomanie, Tunis, Tunisia                                                                                                                                                                                         |
| Ulus Salih Akarca       | Ege University Faculty of Medicine Department of Gastroenterology, Izmir, Turkey                                                                                                                                                                                                            |
| Vera Falcao             | Clinica Sagrada Esperança, Angola                                                                                                                                                                                                                                                           |
| Sossa Edmond Gbedo      | Health Partnerships, Ministry of Health, Benin                                                                                                                                                                                                                                              |
| Serge Ouoba             | Unité de Recherche Clinique de Nanoro (URCN), Institut de Recherche en Science de la Santé (IRSS), Nanoro, Burkina Faso<br>Department of Epidemiology, Infectious Disease Control and Prevention, Graduate School of Biomedical and Health Sciences, Hiroshima University, Hiroshima, Japan |
| Freddy Nyabenda         | National Focal Point for Viral Hepatitis Care, Public Health Emergency Operations Center, Burundi                                                                                                                                                                                           |
| Maurice Rocher Mbella   | Department for the Fight Against Sexually Transmitted Infections and Viral Hepatic Infections, Ministry of Health, Cameroon                                                                                                                                                                 |
| Ali Mahamat Moussa      | Internal Medicine & Gastroenterology Department, Focal Point for the Fight Against Hepatitis, Ministry of Public Health, N'Djamena, Chad                                                                                                                                                    |
| Tadjidine Youssouf      | Focal Point of Comoros at Africa CDC; National Focal Point against NTDs / Human Rabies; NITAG; AMR Focal Point/Laboratory; World Health Organisation, Comoros                                                                                                                               |
| Yoman Boniface          | SOS Hépatites Côte d'Ivoire, Cote d'Ivoire                                                                                                                                                                                                                                                  |
| Tony Akilimali Shindano | Gastroenterology Department, Democratic Republic of the Congo                                                                                                                                                                                                                               |
| Mohammed Elfatih Hamida | Unit of Microbiology, Orotta College of Medicine and Health Sciences (OCMHS), Asmara, Eritrea                                                                                                                                                                                               |



|                               |                                                                                                                                                                                                      |
|-------------------------------|------------------------------------------------------------------------------------------------------------------------------------------------------------------------------------------------------|
| Arnaud Mongo                  | Gastroenterology and Internal Medicine Service, CHU Brazzaville, Congo; Embryology and Genetic Laboratory, Faculty of Health Sciences, Marien Ngouabi University, Brazzaville, Republic of the Congo |
| Cecile Mapapa                 | Gastroenterology and Internal Medicine Service, CHU Brazzaville, Congo; Embryology and Genetic Laboratory, Faculty of Health Sciences, Marien Ngouabi University, Brazzaville, Republic of the Congo |
| Hailemichael Desalegn         | Vestfold Hospital Trust, Norway                                                                                                                                                                      |
| Elisabeth Loue-Andrée Embinga | GABON SOS Hepatitis, Gabon                                                                                                                                                                           |
| Gibril Ndow                   | Hepatology, Department of Metabolism, Digestion and Reproduction, Imperial College London, London, UK; MRC Unit The Gambia, London School of Hygiene & Tropical Medicine, Banjul, The Gambia         |
| Yvonne Nartey                 | Department of Medical Epidemiology and Biostatistics, Karolinska Institutet, Ghana                                                                                                                   |
| Mohamed Cisse                 | Donka Hospital, Conakry, Guinea                                                                                                                                                                      |
| Mamadu Aliu Djalo             | ENDA Guinea-Bissau Bairro Santa Luzia, Bissau, Guinea-Bissau                                                                                                                                         |
| Mary Mugambi                  | National AIDS & STI Control Program, Kenya                                                                                                                                                           |
| Mercy Nyakowa                 | National AIDS & STI Control Program, Kenya                                                                                                                                                           |
| Moses Kerkula Jeuronlon       | World Health Organization, Country Office, Monrovia, Liberia                                                                                                                                         |
| Jonathan Ngoma                | Department of Medicine, Kamuzu Central Hospital, Lilongwe, Malawi; Kamuzu Central Hospital, Ministry of Health, Lilongwe, Malawi                                                                     |
| Rado Manitrana Ramanampamonjy | Department of Gastroenterology, University Hospital Joseph Raseta Befelatanana, Antananarivo, Madagascar; Faculty of Medicine, University of Antananarivo, Madagascar                                |
| Kunal Naik                    | Prévention Information et Lutte Contre le SIDA, Port Louis, Mauritius                                                                                                                                |
| Mungula Devi Soyjaudah        | Ministry of Health Holdings, Mauritius                                                                                                                                                               |
| Eudoxia Filipe                | Focal Point for Hepatitis, National STI, HIV and AIDS Program, Ministry of Health, Mozambique                                                                                                        |
| Eriobu Nnakelu                | Institute of Human Virology, Abuja, Nigeria                                                                                                                                                          |
| Janvier Serumondo             | HIV/AIDS, STIs and Viral Hepatitis Division, Rwanda Biomedical Center, Kigali, Rwanda                                                                                                                |
| Moustapha Mbodj               | Médiateur en santé au Cepiad (Addictions Centre), Senegal                                                                                                                                            |
| Marta Patino                  | Partners In Health Sierra Leone, Sierra Leone                                                                                                                                                        |
| Mikko Kalevi Aalto            | East Africa University, Bosaso, Somalia                                                                                                                                                              |
| Precious Waweru               | Mbabane Government Hospital, Eswatini                                                                                                                                                                |
| Anoumou Dagnra                | National Mycobacteria Reference Laboratory, Ministry of Health, Public Hygiene, and Universal Health Coverage, Lomé, Togo                                                                            |
| Ponsiano Ocama                | Makerere University College of Health Sciences, Kampala, Uganda                                                                                                                                      |
| Abubakar Maghimbi             | Center for International Health, Education, and Biosecurity (CIHEB), Institute of Human Virology, University of                                                                                      |

|                          |                                                                                                                                                        |
|--------------------------|--------------------------------------------------------------------------------------------------------------------------------------------------------|
|                          | Maryland School of Medicine, Dar Es Salaam, the United Republic of Tanzania                                                                            |
| Benson M. Hamooya        | Mulungushi University, School of Medicine and Health Sciences, Livingstone, Zambia                                                                     |
| Leolin Katsidzira        | Faculty of Medicine and Health Sciences, University of Zimbabwe, Harare, Zimbabwe                                                                      |
| Cielo Rios               | STI/HIV/Hepatitis Ministry of Health, Colombia                                                                                                         |
| Monica Thormann          | STI, HIV and Hepatitis Program, Ministry of Public Health, Dominican Republic                                                                          |
| Nada Al Marzooqi         | Public Health and Prevention Department, Ministry of Health, United Arab of Emirates                                                                   |
| Hussain Mohammed Al Rand | Public Health and Prevention Department, Ministry of Health, United Arab of Emirates                                                                   |
| Kesner Francois          | National AIDS and STI Program, Ministry of Health, Haiti                                                                                               |
| Waseem Hamoudi           | Internal Medicine and Gastroenterology and Hepatology, Royal Hospital, Amman, Jordan                                                                   |
| Maryam Alkhatry          | Division of Gastroenterology & Endoscopy, Ibrahim Bin Hamad Obaidullah Hospital (IBHO), Emirates Health Services, Ras Al Khaimah, United Arab Emirates |
| Oleg Skripko             | Clinical Infectious Hospital, Minsk, Belarus                                                                                                           |
| Tereapii Uka             | Public Health Services, Ministry of Health, Cook Islands                                                                                               |

**Supplementary Table 2. Criteria for countries that have drug and alcohol use restrictions for HCV DAA therapy**

| <b>Country</b>         | <b>Drug and alcohol use criteria</b>                                                                                                                                                                                                               |
|------------------------|----------------------------------------------------------------------------------------------------------------------------------------------------------------------------------------------------------------------------------------------------|
| Bosnia and Herzegovina | 6 month abstinence from injection drug and alcohol use*                                                                                                                                                                                            |
| Brunei                 | 6 month abstinence from injection drug use documented in psychiatrist report*<br>People who use drugs may be referred for HCV treatment once admitted to a substance use rehabilitation centre*                                                    |
| Croatia                | 6 month abstinence from injection drug and alcohol use for people who have a history of injection drug use<br>6 month abstinence from injection drug use documented in psychiatrist report<br>Toxicology tests every 3 months during HCV treatment |
| Guyana                 | Completion of a substance use rehabilitation programme*<br>3 month abstinence from drug use*                                                                                                                                                       |
| Libya                  | People who use drugs or alcohol must be referred to an addiction centre prior to HCV treatment* <sup>†</sup>                                                                                                                                       |
| North Macedonia        | People who use drugs or alcohol recommended to receive opioid agonist treatment and/or psychiatric therapy                                                                                                                                         |
| Uruguay                | Evaluation by mental health professional for people who use drugs or alcohol<br>Accompaniment by mental health professional during HCV treatment                                                                                                   |

\*Interpretation of drug or alcohol use restriction criteria by relevant in-country expert

<sup>†</sup>Except in cases wherein HCV treatment is designated as urgent, e.g., HIV co-infection, Child Pugh B

**Supplementary Table 3. Criteria for countries that have retreatment restrictions for HCV DAA therapy**

| <b>Country</b>         | <b>Retreatment criteria</b>                                                               |
|------------------------|-------------------------------------------------------------------------------------------|
| Bosnia and Herzegovina | People who inject drugs can receive reimbursed retreatment on a case by case basis*       |
| Puerto Rico            | Patients can receive one cycle of retreatment                                             |
| Myanmar                | Retreatment is not reimbursed*                                                            |
| South Korea            | Retreatment is partially covered based on patient income<br>SOF/VEL/VOX is not reimbursed |
| North Macedonia        | Retreatment is not reimbursed*                                                            |
| Taiwan                 | Patients can receive one cycle of treatment                                               |
| Türkiye                | Patients can receive one cycle of retreatment*                                            |
| Uruguay                | Retreatment is not reimbursed*                                                            |

\* Interpretation of drug or alcohol use restriction criteria by relevant in-country expert

- Yes restriction (DAA reimbursement limited by restriction of interest)
- None stated (DAA reimbursement is available in country but absence of evidence of restriction of interest)
- No restriction (DAA reimbursement is not limited by restriction of interest)
- Restriction data unavailable (DAA reimbursement is available in country but restriction data unknown)
- Not applicable (DAA reimbursement not available in country)
- No information (country not included in restriction analysis due to lack of reimbursement data)

|                |                         | Prescriber | Fibrosis stage | Drug use | Alcohol use | Retreatment |
|----------------|-------------------------|------------|----------------|----------|-------------|-------------|
| Eastern Europe | Armenia*                | Yes        | No             | No       | NS          | NS          |
|                | Azerbaijan*             | RDU        | NS             | NS       | No          | NS          |
|                | Belarus*                | Yes        | No             | No       | No          | No          |
|                | Bosnia and Herzegovina* | Yes        | No             | Yes      | Yes         | Yes         |
|                | Bulgaria                | Yes        | No             | No       | No          | No          |
|                | Croatia                 | Yes        | No             | Yes      | Yes         | No          |
|                | Czech Republic          | Yes        | No             | No       | No          | No          |
|                | Estonia                 | Yes        | No             | No       | No          | No          |
|                | Georgia*                | No         | No             | No       | NS          | No          |
|                | Hungary                 | Yes        | No             | No       | No          | No          |
|                | Latvia                  | Yes        | Yes            | No       | No          | No          |
|                | Lithuania               | Yes        | Yes            | No       | No          | No          |
|                | Moldova*                | No         | No             | No       | No          | No          |
|                | Poland                  | Yes        | No             | No       | No          | No          |
|                | Romania                 | Yes        | No             | No       | No          | No          |
|                | Russia                  | Yes        | No             | No       | NS          | NS          |
|                | Slovakia                | Yes        | No             | No       | No          | No          |
|                | Ukraine*                | No         | No             | No       | No          | No          |
|                | Svalbard and Jan Mayen  | Yes        | No             | No       | No          | No          |
| Western Europe | Albania*                | RDU        | RDU            | RDU      | RDU         | RDU         |
|                | Andorra                 | NI         | NI             | NI       | NI          | NI          |
|                | Austria                 | Yes        | No             | No       | No          | No          |
|                | Belgium                 | Yes        | No             | No       | No          | NS          |
|                | Denmark                 | Yes        | No             | No       | No          | No          |
|                | England                 | No         | No             | No       | No          | No          |
|                | Finland                 | No         | No             | No       | No          | No          |
|                | North Macedonia*        | Yes        | No             | Yes      | Yes         | Yes         |
|                | France                  | No         | No             | No       | No          | No          |
|                | Germany                 | No         | No             | No       | No          | No          |
|                | Greece                  | Yes        | No             | No       | No          | No          |
|                | Iceland                 | Yes        | No             | No       | No          | No          |
|                | Ireland                 | No         | No             | No       | No          | NS          |
|                | Italy                   | Yes        | No             | No       | No          | NS          |
|                | Liechtenstein           | No         | No             | No       | No          | NS          |
|                | Luxembourg              | Yes        | No             | No       | No          | No          |

|                       |                  |     |     |     |     |     |
|-----------------------|------------------|-----|-----|-----|-----|-----|
|                       | Malta            | Yes | No  | No  | No  | No  |
|                       | Monaco           | NI  | NI  | NI  | NI  | NI  |
|                       | Montenegro*      | NI  | NI  | NI  | NI  | NI  |
|                       | Netherlands      | No  | No  | No  | No  | No  |
|                       | Norway           | Yes | No  | No  | No  | No  |
|                       | Northern Ireland | Yes | No  | No  | No  | No  |
|                       | Portugal         | Yes | No  | No  | No  | NS  |
|                       | San Marino       | NI  | NI  | NI  | NI  | NI  |
|                       | Scotland         | No  | No  | No  | No  | No  |
|                       | Serbia*          | Yes | NS  | NS  | NS  | No  |
|                       | Slovenia         | Yes | No  | No  | No  | No  |
|                       | Spain            | Yes | No  | No  | No  | No  |
|                       | Sweden           | No  | No  | No  | No  | No  |
|                       | Switzerland      | No  | No  | No  | No  | NS  |
|                       | Greenland        | Yes | No  | No  | No  | No  |
|                       | Wales            | No  | No  | No  | No  | No  |
| East & Southeast Asia | Brunei           | Yes | No  | Yes | No  | No  |
|                       | Cambodia*        | N/A | N/A | N/A | N/A | N/A |
|                       | China*           | Yes | NS  | RDU | RDU | RDU |
|                       | North Korea*     | NI  | NI  | NI  | NI  | NI  |
|                       | Indonesia*       | Yes | No  | NS  | NS  | No  |
|                       | Japan            | NS  | NS  | NS  | NS  | NS  |
|                       | Laos*            | N/A | N/A | N/A | N/A | N/A |
|                       | Malaysia*        | Yes | No  | No  | No  | NS  |
|                       | Mongolia*        | Yes | No  | No  | No  | No  |
|                       | Myanmar*         | No  | No  | No  | No  | Yes |
|                       | South Korea      | No  | NS  | No  | NS  | Yes |
|                       | Philippines*     | RDU | RDU | RDU | RDU | RDU |
|                       | Singapore        | Yes | No  | NS  | NS  | No  |
|                       | Taiwan*          | No  | No  | NS  | NS  | Yes |
|                       | Thailand*        | Yes | Yes | No  | No  | No  |
|                       | Timor-Leste*     | Yes | NS  | NS  | NS  | No  |
|                       | Viet Nam*        | Yes | No  | No  | NS  | NS  |
| South Asia            | Afghanistan*     | No  | No  | No  | No  | No  |
|                       | Bangladesh*      | Yes | No  | No  | RDU | No  |
|                       | Bhutan*          | No  | No  | NS  | NS  | NS  |
|                       | India*           | No  | No  | No  | No  | No  |
|                       | Iran*            | Yes | No  | No  | NS  | No  |
|                       | Maldives*        | NI  | NI  | NI  | NI  | NI  |
|                       | Nepal*           | N/A | N/A | N/A | N/A | N/A |
|                       | Pakistan*        | NS  | No  | No  | No  | No  |
|                       | Sri Lanka*       | NI  | NI  | NI  | NI  | NI  |

|                     |                               |     |     |     |     |     |
|---------------------|-------------------------------|-----|-----|-----|-----|-----|
| Central Asia        | Kazakhstan*                   | Yes | No  | No  | No  | No  |
|                     | Kyrgyzstan*                   | N/A | N/A | N/A | N/A | N/A |
|                     | Tajikistan*                   | N/A | N/A | N/A | N/A | N/A |
|                     | Turkmenistan*                 | NI  | NI  | NI  | NI  | NI  |
|                     | Uzbekistan*                   | Yes | No  | No  | No  | No  |
| Caribbean           | Antigua and Barbuda           | NI  | NI  | NI  | NI  | NI  |
|                     | Bahamas                       | NI  | NI  | NI  | NI  | NI  |
|                     | Barbados                      | NI  | NI  | NI  | NI  | NI  |
|                     | Bermuda                       | NI  | NI  | NI  | NI  | NI  |
|                     | Puerto Rico                   | No  | No  | No  | No  | Yes |
|                     | Cuba*                         | NI  | NI  | NI  | NI  | NI  |
|                     | Dominica*                     | NI  | NI  | NI  | NI  | NI  |
|                     | Dominican Republic*           | Yes | No  | NS  | NS  | No  |
|                     | Grenada*                      | NI  | NI  | NI  | NI  | NI  |
|                     | Haiti*                        | NS  | No  | No  | NS  | No  |
|                     | Jamaica*                      | N/A | N/A | N/A | N/A | N/A |
|                     | Saint Kitts and Nevis         | NI  | NI  | NI  | NI  | NI  |
|                     | Saint Lucia*                  | NI  | NI  | NI  | NI  | NI  |
|                     | Saint Vincent and Grenadines* | N/A | N/A | N/A | N/A | N/A |
| Trinidad and Tobago | N/A                           | N/A | N/A | N/A | N/A |     |
| Latin America       | Argentina*                    | No  | No  | No  | No  | No  |
|                     | Belize*                       | NI  | NI  | NI  | NI  | NI  |
|                     | Bolivia*                      | Yes | No  | RDU | RDU | No  |
|                     | Brazil*                       | No  | No  | No  | No  | No  |
|                     | Chile                         | Yes | No  | NS  | NS  | NS  |
|                     | Colombia*                     | Yes | No  | No  | No  | No  |
|                     | Costa Rica*                   | NI  | NI  | NI  | NI  | NI  |
|                     | Ecuador*                      | Yes | No  | No  | No  | No  |
|                     | El Salvador*                  | NI  | NI  | NI  | NI  | NI  |
|                     | Guatemala*                    | No  | No  | No  | NS  | No  |
|                     | Guyana*                       | Yes | No  | Yes | NS  | No  |
|                     | Honduras*                     | NI  | NI  | NI  | NI  | NI  |
|                     | Mexico*                       | No  | No  | No  | No  | NS  |
|                     | Nicaragua*                    | NI  | NI  | NI  | NI  | NI  |
|                     | Panama*                       | NI  | NI  | NI  | NI  | NI  |
|                     | Paraguay*                     | NI  | NI  | NI  | NI  | NI  |
|                     | Peru*                         | Yes | No  | No  | No  | No  |
|                     | Suriname*                     | NI  | NI  | NI  | NI  | NI  |
|                     | Uruguay                       | Yes | NS  | Yes | Yes | Yes |
|                     | Venezuela*                    | N/A | N/A | N/A | N/A | N/A |
| French Guiana       | NI                            | NI  | NI  | NI  | NI  |     |
| North America       | Canada                        | No  | No  | NS  | NS  | NS  |
|                     | USA                           | No  | No  | No  | No  | No  |

|                                                   |                                 |     |     |     |     |     |
|---------------------------------------------------|---------------------------------|-----|-----|-----|-----|-----|
| <b>Pacific Island Countries &amp; Territories</b> | American Samoa                  | NI  | NI  | NI  | NI  | NI  |
|                                                   | Cook Islands                    | No  | No  | No  | No  | No  |
|                                                   | Fed. States of Micronesia*      | NI  | NI  | NI  | NI  | NI  |
|                                                   | Fiji*                           | N/A | N/A | N/A | N/A | N/A |
|                                                   | French Polynesia                | NI  | NI  | NI  | NI  | NI  |
|                                                   | Guam                            | NI  | NI  | NI  | NI  | NI  |
|                                                   | Kiribati*                       | NI  | NI  | NI  | NI  | NI  |
|                                                   | Marshall Islands*               | NI  | NI  | NI  | NI  | NI  |
|                                                   | Nauru*                          | NI  | NI  | NI  | NI  | NI  |
|                                                   | New Caledonia                   | NI  | NI  | NI  | NI  | NI  |
|                                                   | Palau*                          | NI  | NI  | NI  | NI  | NI  |
|                                                   | Papua New Guinea*               | N/A | N/A | N/A | N/A | N/A |
|                                                   | Samoa*                          | NI  | NI  | NI  | NI  | NI  |
|                                                   | Solomon Islands*                | NI  | NI  | NI  | NI  | NI  |
|                                                   | Tonga*                          | NI  | NI  | NI  | NI  | NI  |
| Tuvalu*                                           | NI                              | NI  | NI  | NI  | NI  |     |
| Vanuatu*                                          | NI                              | NI  | NI  | NI  | NI  |     |
| <b>Australasia</b>                                | Australia                       | No  | No  | No  | No  | No  |
|                                                   | New Zealand                     | No  | No  | No  | No  | No  |
| <b>Middle East &amp; North Africa</b>             | Algeria*                        | Yes | No  | No  | No  | No  |
|                                                   | Bahrain                         | Yes | No  | No  | No  | No  |
|                                                   | Cyprus                          | NI  | NI  | NI  | NI  | NI  |
|                                                   | Egypt*                          | NS  | No  | NS  | NS  | No  |
|                                                   | Iraq*                           | NI  | NI  | NI  | NI  | NI  |
|                                                   | Israel                          | No  | No  | NS  | NS  | NS  |
|                                                   | Jordan*                         | NI  | NI  | NI  | NI  | NI  |
|                                                   | Kuwait                          | Yes | No  | No  | No  | No  |
|                                                   | Lebanon*                        | NI  | NI  | NI  | NI  | NI  |
|                                                   | Libya*                          | Yes | RDU | Yes | Yes | RDU |
|                                                   | Morocco*                        | Yes | NS  | No  | NS  | No  |
|                                                   | Occupied Palestinian Territory* | N/A | N/A | N/A | N/A | N/A |
|                                                   | Oman                            | Yes | No  | No  | No  | No  |
|                                                   | Qatar                           | NI  | NI  | NI  | NI  | NI  |
|                                                   | Saudi Arabia                    | Yes | No  | NS  | NS  | No  |
|                                                   | Sudan*                          | N/A | N/A | N/A | N/A | N/A |
|                                                   | Syrian Arab Republic*           | NI  | NI  | NI  | NI  | NI  |
|                                                   | Tunisia*                        | Yes | No  | NS  | NS  | NS  |
|                                                   | Türkiye*                        | Yes | No  | NS  | NS  | Yes |
|                                                   | United Arab Emirates            | Yes | No  | No  | No  | No  |
| Yemen*                                            | NI                              | NI  | NI  | NI  | NI  |     |
| Western Sahara*                                   | NI                              | NI  | NI  | NI  | NI  |     |



Sub-Saharan Africa

|                           |     |     |     |     |     |
|---------------------------|-----|-----|-----|-----|-----|
| Angola*                   | N/A | N/A | N/A | N/A | N/A |
| Benin*                    | Yes | No  | NS  | NS  | No  |
| Botswana*                 | NI  | NI  | NI  | NI  | NI  |
| Burkina Faso*             | N/A | N/A | N/A | N/A | N/A |
| Burundi*                  | N/A | N/A | N/A | N/A | N/A |
| Cameroon*                 | No  | No  | No  | No  | No  |
| Cape Verde*               | NI  | NI  | NI  | NI  | NI  |
| Central African Republic* | NI  | NI  | NI  | NI  | NI  |
| Chad*                     | N/A | N/A | N/A | N/A | N/A |
| Comoros*                  | N/A | N/A | N/A | N/A | N/A |
| Cote d'Ivoire*            | N/A | N/A | N/A | N/A | N/A |
| DR Congo*                 | N/A | N/A | N/A | N/A | N/A |
| Djibouti*                 | NI  | NI  | NI  | NI  | NI  |
| Equatorial Guinea*        | NI  | NI  | NI  | NI  | NI  |
| Eritrea*                  | Yes | No  | NS  | NS  | NS  |
| Ethiopia*                 | N/A | N/A | N/A | N/A | N/A |
| Gabon*                    | No  | No  | No  | No  | No  |
| The Gambia*               | N/A | N/A | N/A | N/A | N/A |
| Ghana*                    | N/A | N/A | N/A | N/A | N/A |
| Guinea*                   | No  | NS  | NS  | NS  | No  |
| Guinea-Bissau*            | N/A | N/A | N/A | N/A | N/A |
| Kenya*                    | NS  | NS  | No  | NS  | NS  |
| Lesotho*                  | NI  | NI  | NI  | NI  | NI  |
| Liberia*                  | N/A | N/A | N/A | N/A | N/A |
| Madagascar*               | N/A | N/A | N/A | N/A | N/A |
| Malawi*                   | N/A | N/A | N/A | N/A | N/A |
| Mali*                     | NI  | NI  | NI  | NI  | NI  |
| Mauritania*               | NI  | NI  | NI  | NI  | NI  |
| Mauritius*                | Yes | No  | NS  | No  | No  |
| Mozambique*               | Yes | No  | No  | NS  | NS  |
| Namibia*                  | NI  | NI  | NI  | NI  | NI  |
| Niger*                    | NI  | NI  | NI  | NI  | NI  |
| Nigeria*                  | N/A | N/A | N/A | N/A | N/A |
| Republic of the Congo*    | N/A | N/A | N/A | N/A | N/A |
| Rwanda*                   | No  | No  | NS  | NS  | No  |
| São Tomé and Príncipe*    | NI  | NI  | NI  | NI  | NI  |
| Senegal*                  | N/A | N/A | N/A | N/A | N/A |
| Seychelles                | NI  | NI  | NI  | NI  | NI  |
| Sierra Leone*             | N/A | N/A | N/A | N/A | N/A |
| Somalia*                  | N/A | N/A | N/A | N/A | N/A |
| South Africa*             | N/A | N/A | N/A | N/A | N/A |
| Eswatini*                 | N/A | N/A | N/A | N/A | N/A |
| Togo*                     | N/A | N/A | N/A | N/A | N/A |
| Uganda*                   | N/A | N/A | N/A | N/A | N/A |

|              |     |     |     |     |     |
|--------------|-----|-----|-----|-----|-----|
| Tanzania*    | N/A | N/A | N/A | N/A | N/A |
| Zambia*      | N/A | N/A | N/A | N/A | N/A |
| Zimbabwe*    | N/A | N/A | N/A | N/A | N/A |
| South Sudan* | N/A | N/A | N/A | N/A | N/A |

**Supplementary Figure 1. Restrictions to reimbursed DAAs for HCV infection by country**

\*=Designated as low- and middle-income country or territories as defined by Development Assistance Committee of Official Development Assistance recipients. Effective for reporting on 2022 and 2023 flows. Organisation for Economic Co-operation and Development. List can be accessed here: [oe.cd/dac-list-oda-recipients](https://oe.cd/dac-list-oda-recipients)
